# Supplementary material for: Examining the Potential Synergistic Effects Between Mindfulness Training and Psychedelic-Assisted Therapy
Source: Frontiers journal article supplement (doi:10.3389/fpsyt.2021.707057), 2021-08-11
Supplement: Data_Sheet_1.pdf [file Data_Sheet_1.pdf]

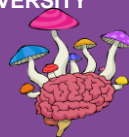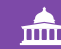

## Background:

- Mindfulness meditation and related interventions have demonstrated therapeutic potential for addiction<sup>1</sup>, anxiety<sup>2</sup>, stress<sup>3</sup> and depression<sup>2</sup> and enhancements in well-being<sup>4,5</sup>
- Psychedelics have been successfully applied to addiction<sup>6</sup>, depression<sup>7,8</sup>, anxiety<sup>6</sup>, eating disorders<sup>9</sup> and give rise to lasting benefits in healthy population<sup>10,11</sup>
- Due to their common effects and various shared therapeutic mechanisms, these two interventions have been suggested to induce complementary effects if combined<sup>12</sup>.

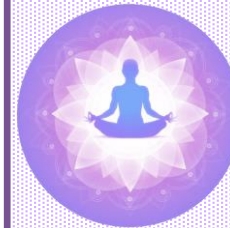

## Evidence for synergistic Effects

| Study                     | Substance  | Sample (size)                                                | Study design                                                                                                                    | Findings                                                                                                                                                                                                                                                                                                                                                                                                                                                                                                                                                                                                                                                                                                                                                                                   |
|---------------------------|------------|--------------------------------------------------------------|---------------------------------------------------------------------------------------------------------------------------------|--------------------------------------------------------------------------------------------------------------------------------------------------------------------------------------------------------------------------------------------------------------------------------------------------------------------------------------------------------------------------------------------------------------------------------------------------------------------------------------------------------------------------------------------------------------------------------------------------------------------------------------------------------------------------------------------------------------------------------------------------------------------------------------------|
| Griffiths et al. (2018)   | Psilocybin | Healthy sample (n=75)                                        | 2 sessions (or active control) combined with moderate/high intensity 6-month programme of spiritual practices; DB, R, PC, WS+BS | <ul style="list-style-type: none"> <li>• ↑mood, well-being + life satisfaction &gt; control group</li> <li>• ↑Life meaning, ↑Trait forgiveness, ↑Spirituality, ↑Daily transcendental experience, ↑Positive Attitudes about Oneself ↑Interpersonal closeness and ↑Gratitude 4 months after last psilocybin session for experimental group, compared to baseline</li> <li>• Engagement in Daily Meditation, ↑Meditation Duration, ↑Frequency of Spiritual Awareness Practice, ↑Engagement in Daily Spiritual Practice &amp; ↑Frequency of Journal Writing 4 months after last psilocybin session for experimental group, compared to baseline</li> <li>• →Unprecedented trait changes produced: failed to be demonstrated after psilocybin without mindfulness<sup>13,14,15</sup></li> </ul> |
| Smigielski et al. (2019a) | Psilocybin | Healthy sample of experienced mind-fulness meditators (n=25) | Single session during 5-day Zen meditation retreat; DB, R, PC, WS + BS                                                          | <ul style="list-style-type: none"> <li>• ↑Appreciation for life, ↑Self-Acceptance, ↑Quest for meaning, ↓Fear of Death, + ↑Trait Mindfulness 4 months after retreat &gt; control group</li> <li>• ↑Meditation Depth on the day of administration</li> <li>• →Unprecedented trait changes produced: failed to be demonstrated after psilocybin without mindfulness<sup>13,14,15</sup></li> </ul>                                                                                                                                                                                                                                                                                                                                                                                             |
| Dakwar et al. (2019)      | Ketamine   | Clinical sample at risk of cocaine addiction (n=55)          | I.V. Ketamine administered once during 5-week MBRP programme                                                                    | <ul style="list-style-type: none"> <li>• x5 abstinence rates for experimental group, x7.8 less likely to relapse than control</li> <li>• 44% abstinence maintained at 6-month follow-up vs. 0% for control group →Extended ketamine's anti-addictive effects, which had only been reported transiently<sup>16,17</sup></li> </ul>                                                                                                                                                                                                                                                                                                                                                                                                                                                          |

DB: Double-blind; R: Randomized; PC: Placebo-Controlled; WS: Within-Subject comparison; BS: Between-Subject comparison

## Conclusions:

- These studies provide promising evidence for complementary effects between mindfulness meditation and psychedelic administration
- Evidence is preliminary and requires replication
- Depression could benefit the most from a combined methodology

## Mechanisms underlying synergistic effects:

- **Anti-depressive/Anxiolytic Effects**
  - Demonstrated effectively for MBCT, ketamine, ayahuasca and psilocybin
  - Psychedelics also led to ↓ symptomatology in healthy volunteers
  - Subverted by psychological effects and neurogenesis, which has been observed for both interventions
- **Mystical Experiences**
  - Predicted therapeutic benefit in both interventions
  - Mindfulness intensified mystical experiences in combined designs
- **Psychological Mechanisms**
  - Cognitive flexibility, emotional flexibility, decentering, nonattachment
- **Neuromodulatory Changes**
  - Acute disruption of the Default Mode Network
  - Long-term enhancements of dynamic global brain connectivity
  - ↑Harmony between DMN and TPN networks

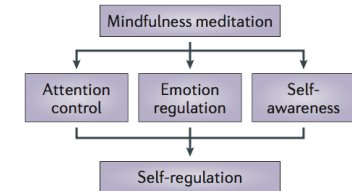

Figure 1: Psychological benefits of mindfulness meditation training (Tang et al., 2017)

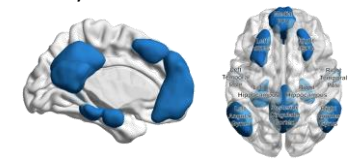

Figure 2: The human Default Mode Network (DMN) (McCormick & Telzer, 2018)
